# Supplementary material
Source: publisher site journal article supplement (https://www.dovepress.com/get_supplementary_file.php?f=452605.docx)
Supplement: Supplementary file 1 [file get_supplementary_file.php]

**Questionnaire**

**Part I**

**Question 1** Please provide your province, city and region

**Question 2** Hospital name

**Question 3** Your name

**Question 4** What kind of hospital are you in? [single choice]

a. Cancer specialist hospitals

b. Tertiary levels of general hospitals

c. Secondary levels of general hospitals

d. Primary levels of general hospitals

**Question 5** How long have you worked? [single choice]

a. < 5 years

b. 5-10 years

c. 10-20 years

d. >20 years

**Question 6** What is your professional title? [single choice]

a. Junior professional title

b. Intermediate professional title

c. Senior professional title

d. Other

**Question 7** What department do you work in? [single choice]

a. Oncology department

b. Pain department

c. Palliative care department

d. Other

**Question 8** The number of open beds in your department [single choice]

a. ≤5

b. 6-10

c. 11-20

d. 21-30

e. 31-40

f. ≥41

**Question 9** Of the cancer patients you treat, what is the average number of outpatient and ward patients per month? [single choice]

a. 10-20

b. 21-30

c. 31-40

d. 41-50

e. ≥51

**Question 10** Among the patients you have treated, how many cancer pain patients per month on average? [single choice]

a. <10

b. 10-20

c. 21-30

d. 31-50

e. ≥51

**Question 11** In your opinion, what percentage of cancer pain patients received sufficient analgesia? [single choice]

a. 100%

b. >80%

c. 50%-80%

d. 20%-50%

e. ≤20%

**Question 12** What is the average number of refractory cancer pain patients per month among the patients you treat? [single choice]

a. 1-5

b. 6-10

c. 11-15

d. ≥16

**Part II**

**Question 13** In your opinion, which of the following conditions are defined as breakthrough cancer pain? [single choice]

a. A sudden increase in pain

b. The pain reaches its peak in 15-30 minutes, and then gradually decreases over time

c. A sudden, transient increase in pain that occurs spontaneously or is triggered by some predictable or unpredictable factor when background pain control is relatively stable and analgesic drugs are fully used

**Question 14** In your clinical practice, what is the percentage of cancer pain patients that you have treated who experience breakthrough cancer pain? [single choice]

a. 100%-75%

b. 75%-50%

c. 50%-25%

d. ≤ 25%

**Question 15** what are the common treatment methods you often use in the treatment of patients with breakthrough cancer pain? [multiple choice]

a. Oral morphine sustained-release tablets

b. Oral morphine immediate release tablets

c. Oral oxycodone sustained-release tablets

d. Oral oxycodone immediate release tablets

e. Intravenous or subcutaneous injection of morphine

f. Intravenous or intramuscular injection of pethidine hydrochloride

g. Intravenous or subcutaneous injection of hydromorphone injection

h. PCA administered morphine injection

i. PCA administration of hydromorphone injection

**Question 16** In clinical practice, how satisfied are you with the management of breakthrough cancer pain? [single choice]

a. ≤ 25%

b. 25%-50%

c. 50%-75%

d. ≥ 75%

**Part III**

**Question 17** In your opinion, what are the factors that cause poor pain control in cancer pain patients? [multiple choice]

a. Limited drug options

b. Worried about drug addiction

c. Inadequate patient education

d. Refractory pain has a complex condition and poor drug efficacy

e. Opioid drugs are not covered by regional medical insurance

f. Impact of hospital drug proportion

g. Patient's family members do not cooperate

h. Other

**Question 18** Do you know about refractory cancer pain? [single choice]

a. Fully understand

b. Partially understand

c. Not clear

**Question 19** Have you received any training on knowledge related to refractory cancer pain? [single choice]

a. Yes

b. No

**Question 20** Which of the following conditions do you think may be diagnosed as refractory cancer pain? [multiple choice]

a. Moderate to severe pain caused by the tumor itself or factors related to tumor treatment

b. After standardized drug treatment，the pain has been basically relieved, but the adverse reactions are intolerable

c. Failure to alleviate pain and/or intolerable adverse reactions after standardized drug treatment

d. Continuous pain digital score ≥ 4 points and/or number of BTCP ≥ 3 times/day

e. Unclear

**Question 21** Do you think effective analgesic measures should be taken for patients with refractory cancer pain? [single choice]

a. Very necessary

b. Necessary

c. Whatever

d. Not necessary

**Question 22** In your opinion, which of the following conditions belong to refractory cancer pain? [multiple choice]

a. Oral administration of 200 mg/d (equivalent oral morphine dose) or above of strong opioid analgesics still can not effectively alleviate pain

b. The patient's pain is unstable and requires frequent dosage adjustments

c. Serious adverse reactions occur

d. Pain in special areas, such as perineal pain and neuropathic pain

e. Patients cannot take orally

f. Patient's overall discomfort

g. Other

**Question 23** In your opinion, what are the common clinical types of refractory cancer pain? [multiple choice]

a. Cancerous neuropathic pain

b. Cancerous visceral pain

c. Bone metastatic cancer pain

d. Breakthrough cancer pain

e. Other

**Question 24** what are the common treatment methods you often use in the treatment of patients with refractory cancer pain? [multiple choice]

a. Oral administration

b. Patch

c. PCA

d. Systemic administration combined with local treatment

e. Other

**Question 25** What do you think are the barriers to effective management of refractory cancer pain? [ranking questions]

a. Lack of treatment methods for RCP

b. Lack of knowledge related to RCP

c. Single drug dosage form

d. Worried about the side effects of analgesic drugs

e. Empirical medication and habitually increasing the dosage of oral analgesic drugs to solve pain problems

f. Worried about patients becoming addicted to analgesic drugs

g. Concerns about the management regulations of narcotic drugs

**Question 26** What knowledge do you hope to gain from the training of refractory cancer pain? [multiple choice]

a. Dose adjustment for patients with poor pain control

b. Treatment methods for RCP

c. Pharmacological characteristics of analgesic drugs and how to choose drugs reasonably

d. Comprehensive assessment of pain

e. Management of RCP

**Question 27** In order to improve the current situation of unsatisfactory cancer pain relief, what do you think is the most needed improvement at this stage? [ranking questions]

a. Improve medical staff's understanding and treatment techniques for RCP

b. Update of treatment techniques and methods

c. Improve the configuration of drug types in medical institutions

d. Patient education

e. Close cooperation from higher-level hospitals and improvement of two-way referrals

f. Relieve patients' anxiety and depression

g. Reduce expensive treatment costs

h. Easy access to medication

i. Other

**Question 28** Among the patients currently diagnosed and treated, where will patients with RCP go in the later stages? [multiple choice]

a. If the admission conditions are not met, the oral dose will be increased and the patient is given oral medication at home

b. Referral to a hospital department with specialized treatment techniques

c. Referred to the palliative care unit of a nearby community hospital for hospice care

d. Admitted for treatment in our hospital or department

e. Other

**Question 29** Do you think that family members should participate in the diagnosis and treatment of refractory cancer pain? [single choice]

a. Must

b. No need

c. not essential
